# Supplementary material
Source: bioRxiv or medRxiv preprint supplement (https://www.biorxiv.org/highwire/filestream/12864/field_highwire_adjunct_files/0/047514-1.pdf)
Supplement: Supplementary file [file 047514-1.pdf]

## Pan cancer pathway list corresponding to Figure 2

| Row | Pathway/principle component                     | Row | Pathway/principle component                  |
|-----|-------------------------------------------------|-----|----------------------------------------------|
| 1   | D-Glutamine and D-glutamate metabolism - 2      | 51  | Complement and coagulation cascades - 1      |
| 2   | Pyruvate metabolism - 2                         | 52  | RIG-I-like receptor signaling pathway - 1    |
| 3   | Riboflavin metabolism - 2                       | 53  | Toll-like receptor signaling pathway - 1     |
| 4   | Selenocompound metabolism - 2                   | 54  | Small cell lung cancer - 1                   |
| 5   | Histidine metabolism - 2                        | 55  | MicroRNAs in cancer - 1                      |
| 6   | Nicotinate and nicotinamide metabolism - 2      | 56  | African trypanosomiasis - 1                  |
| 7   | cAMP signaling pathway - 1                      | 57  | Gap junction - 1                             |
| 8   | cGMP-PKG signaling pathway - 1                  | 58  | Taurine and hypotaurine metabolism - 1       |
| 9   | Non-alcoholic fatty liver disease (NAFLD) - 1   | 59  | Cyanoamino acid metabolism - 1               |
| 10  | TNF signaling pathway - 1                       | 60  | Selenocompound metabolism - 1                |
| 11  | Aldosterone-regulated sodium reabsorption - 1   | 61  | Riboflavin metabolism - 1                    |
| 12  | Hematopoietic cell lineage - 1                  | 62  | Propanoate metabolism - 1                    |
| 13  | Olfactory transduction - 1                      | 63  | beta-Alanine metabolism - 1                  |
| 14  | Fanconi anemia pathway - 2                      | 64  | Tryptophan metabolism - 1                    |
| 15  | Glutathione metabolism - 2                      | 65  | Pyrimidine metabolism - 1                    |
| 16  | MAPK signaling pathway - 2                      | 66  | Glyoxylate and dicarboxylate metabolism - 1  |
| 17  | Homologous recombination - 2                    | 67  | Nicotinate and nicotinamide metabolism - 1   |
| 18  | Non-homologous end-joining - 2                  | 68  | Retinol metabolism - 1                       |
| 19  | Dorso-ventral axis formation - 2                | 69  | Central carbon metabolism in cancer - 1      |
| 20  | Valine, leucine and isoleucine biosynthesis - 2 | 70  | Choline metabolism in cancer - 1             |
| 21  | GnRH signaling pathway - 2                      | 71  | Metabolic pathways - 1                       |
| 22  | Nitrogen metabolism - 2                         | 72  | Glycine, serine and threonine metabolism - 1 |
| 23  | Other types of O-glycan biosynthesis - 1        | 73  | Ether lipid metabolism - 1                   |
| 24  | Biotin metabolism - 1                           | 74  | Caffeine metabolism - 1                      |
| 25  | Lipoic acid metabolism - 1                      | 75  | Inositol phosphate metabolism - 1            |
| 26  | GABAergic synapse - 1                           | 76  | Glycerophospholipid metabolism - 1           |
| 27  | Renal cell carcinoma - 1                        | 77  | Histidine metabolism - 1                     |
| 28  | Central carbon metabolism in cancer - 1         | 78  | Fatty acid metabolism - 1                    |
| 29  | NOD-like receptor signaling pathway - 1         | 79  | 2-Oxocarboxylic acid metabolism - 1          |
| 30  | Jak-STAT signaling pathway - 1                  | 80  | Glycerolipid metabolism - 1                  |
| 31  | Antigen processing and presentation - 1         | 81  | Glycosylphosphatidylinositol - 1             |
| 32  | Cell adhesion molecules (CAMs) - 1              | 82  | Linoleic acid metabolism - 1                 |
| 33  | Amyotrophic lateral sclerosis (ALS) - 1         | 83  | Terpenoid backbone biosynthesis - 1          |
| 34  | Primary immunodeficiency - 1                    | 84  | Folate biosynthesis - 1                      |
| 35  | Longevity regulating pathway - mammal - 1       | 85  | Ribosome - 1                                 |
| 36  | Dilated cardiomyopathy - 2                      | 86  | PPAR signaling pathway - 1                   |
| 37  | Lipoic acid metabolism - 2                      | 87  | ECM-receptor interaction - 1                 |
| 38  | Protein export - 2                              | 88  | Acute myeloid leukemia - 1                   |
| 39  | Cysteine and methionine metabolism - 2          | 89  | Salmonella infection - 1                     |
| 40  | Glycosphingolipid biosynthesis - ganglio - 2    | 90  | Dilated cardiomyopathy - 1                   |
| 41  | Pantothenate and CoA biosynthesis - 2           | 91  | Galactose metabolism - 1                     |
| 42  | Ovarian steroidogenesis - 2                     | 92  | Glycosaminoglycan biosynthesis - 1           |
| 43  | Glycine, serine and threonine metabolism - 2    | 93  | Prolactin signaling pathway - 1              |
| 44  | Valine, leucine and isoleucine degradation - 2  | 94  | MAPK signaling pathway - 1                   |
| 45  | Tyrosine metabolism - 1                         | 95  | Nucleotide excision repair - 1               |
| 46  | Metabolism of xenobiotics by cytochrome - 1     | 96  | Non-homologous end-joining - 1               |
| 47  | Glycosaminoglycan biosynthesis - 1              | 97  | Nitrogen metabolism - 1                      |
| 48  | Estrogen signaling pathway - 1                  | 98  | Carbon metabolism - 2                        |
| 49  | Leishmaniasis - 1                               | 99  | Inflammatory mediator regulation of TRP - 1  |
| 50  | AMPK signaling pathway - 1                      | 100 | Fc gamma R-mediated phagocytosis - 1         |

| Row | Pathway/principle component                    | Row | Pathway/principle component                       |
|-----|------------------------------------------------|-----|---------------------------------------------------|
| 101 | Phenylalanine metabolism - 1                   | 151 | ABC transporters - 2                              |
| 102 | Insulin secretion - 1                          | 152 | Ribosome biogenesis in eukaryotes - 2             |
| 103 | GnRH signaling pathway - 1                     | 153 | mRNA surveillance pathway - 2                     |
| 104 | N-Glycan biosynthesis - 1                      | 154 | ErbB signaling pathway - 2                        |
| 105 | Glycosaminoglycan biosynthesis - 1             | 155 | Nicotinate and nicotinamide metabolism - 1        |
| 106 | Pentose and glucuronate interconversions - 1   | 156 | Basal transcription factors - 1                   |
| 107 | Cardiac muscle contraction - 1                 | 157 | DNA replication - 1                               |
| 108 | Butirosin and neomycin biosynthesis - 1        | 158 | Gap junction - 2                                  |
| 109 | Starch and sucrose metabolism - 1              | 159 | Endocytosis - 2                                   |
| 110 | Ascorbate and aldarate metabolism - 1          | 160 | SNARE interactions in vesicular transport - 2     |
| 111 | Citrate cycle (TCA cycle) - 1                  | 161 | Phagosome - 2                                     |
| 112 | Other glycan degradation - 1                   | 162 | Autoimmune thyroid disease - 2                    |
| 113 | Fructose and mannose metabolism - 1            | 163 | Antigen processing and presentation - 2           |
| 114 | Biosynthesis of unsaturated fatty acids - 1    | 164 | Toxoplasmosis - 2                                 |
| 115 | ABC transporters - 1                           | 165 | Renin-angiotensin system - 2                      |
| 116 | Cholinergic synapse - 1                        | 166 | Steroid hormone biosynthesis - 2                  |
| 117 | HIF-1 signaling pathway - 1                    | 167 | Sulfur metabolism - 2                             |
| 118 | Hippo signaling pathway - 1                    | 168 | Glyoxylate and dicarboxylate metabolism - 2       |
| 119 | Retrograde endocannabinoid signaling - 1       | 169 | Propanoate metabolism - 2                         |
| 120 | FoxO signaling pathway - 1                     | 170 | Glycosphingolipid biosynthesis - globo series - 2 |
| 121 | Cytokine-cytokine receptor interaction - 1     | 171 | Ether lipid metabolism - 2                        |
| 122 | Chemokine signaling pathway - 1                | 172 | Linoleic acid metabolism - 2                      |
| 123 | Phosphatidylinositol signaling system - 1      | 173 | Glycosaminoglycan degradation - 2                 |
| 124 | Glyoxylate and dicarboxylate metabolism - 1    | 174 | alpha-Linolenic acid metabolism - 2               |
| 125 | Ether lipid metabolism - 2                     | 175 | Ribosome - 2                                      |
| 126 | Linoleic acid metabolism - 2                   | 176 | Arginine and proline metabolism - 2               |
| 127 | Glycosaminoglycan degradation - 2              | 177 | PPAR signaling pathway - 2                        |
| 128 | alpha-Linolenic acid metabolism - 2            | 178 | Glycosphingolipid biosynthesis - globo series - 1 |
| 129 | Gap junction - 2                               | 179 | Retinol metabolism - 1                            |
| 130 | Peroxisome - 2                                 | 180 | Pertussis - 1                                     |
| 131 | Apoptosis - 2                                  | 181 | Epstein-Barr virus infection - 1                  |
| 132 | Signaling pathways regulating pluripotency - 2 | 182 | Sphingolipid signaling pathway - 1                |
| 133 | Phagosome - 2                                  | 183 | mTOR signaling pathway - 1                        |
| 134 | Regulation of autophagy - 2                    | 184 | Focal adhesion - 1                                |
| 135 | Cell cycle - 2                                 | 185 | Toxoplasmosis - 1                                 |
| 136 | Tight junction - 2                             | 186 | Chagas disease (American trypanosomiasis) - 1     |
| 137 | p53 signaling pathway - 2                      | 187 | mRNA surveillance pathway - 2                     |
| 138 | Adherens junction - 2                          | 188 | ErbB signaling pathway - 2                        |
| 139 | Focal adhesion - 2                             | 189 | Fanconi anemia pathway - 2                        |
| 140 | Regulation of actin cytoskeleton - 2           | 190 | Glutathione metabolism - 2                        |
| 141 | Ribosome - 2                                   | 191 | MAPK signaling pathway - 2                        |
| 142 | Arginine and proline metabolism - 2            | 192 | Homologous recombination - 2                      |
| 143 | PPAR signaling pathway - 2                     | 193 | Non-homologous end-joining - 2                    |
| 144 | p53 signaling pathway - 1                      | 194 | Dorso-ventral axis formation - 2                  |
| 145 | cAMP signaling pathway - 1                     | 195 | Valine, leucine and isoleucine biosynthesis - 2   |
| 146 | cGMP-PKG signaling pathway - 1                 | 196 | GnRH signaling pathway - 2                        |
| 147 | Alzheimers disease - 2                         | 197 | Nitrogen metabolism - 2                           |
| 148 | Amphetamine addiction - 2                      | 198 | Other types of O-glycan biosynthesis - 1          |
| 149 | Chemokine signaling pathway - 2                | 199 | Biotin metabolism - 1                             |
| 150 | Purine metabolism - 2                          | 200 | Lipoic acid metabolism - 1                        |

| Row | Pathway/principle component                     | Row | Pathway/principle component                     |
|-----|-------------------------------------------------|-----|-------------------------------------------------|
| 201 | GABAergic synapse - 1                           | 251 | D-Glutamine and D-glutamate metabolism - 1      |
| 202 | Renal cell carcinoma - 1                        | 252 | Arachidonic acid metabolism - 1                 |
| 203 | Amoebiasis - 1                                  | 253 | Thyroid hormone synthesis - 1                   |
| 204 | Hepatitis C - 1                                 | 254 | Cysteine and methionine metabolism - 1          |
| 205 | Alanine, aspartate and glutamate metabolism - 1 | 255 | Porphyrin and chlorophyll metabolism - 1        |
| 206 | Staphylococcus aureus infection - 1             | 256 | Degradation of aromatic compounds - 1           |
| 207 | Pentose phosphate pathway - 1                   | 257 | Drug metabolism - cytochrome P450 - 1           |
| 208 | Fatty acid biosynthesis - 1                     | 258 | Thiamine metabolism - 1                         |
| 209 | Oxidative phosphorylation - 1                   | 259 | Valine, leucine and isoleucine degradation - 1  |
| 210 | Purine metabolism - 1                           | 260 | Salivary secretion - 1                          |
| 211 | Mucin type O-Glycan biosynthesis - 1            | 261 | alpha-Linolenic acid metabolism - 1             |
| 212 | Arginine biosynthesis - 1                       | 262 | Caffeine metabolism - 1                         |
| 213 | N-Glycan biosynthesis - 1                       | 263 | Inositol phosphate metabolism - 1               |
| 214 | Glycosaminoglycan biosynthesis - 1              | 264 | Lysine biosynthesis - 1                         |
| 215 | Pentose and glucuronate interconversions - 1    | 265 | Glycerophospholipid metabolism - 1              |
| 216 | Cardiac muscle contraction - 1                  | 266 | Peroxisome - 1                                  |
| 217 | Butirosin and neomycin biosynthesis - 1         | 267 | Gap junction - 1                                |
| 218 | Starch and sucrose metabolism - 1               | 268 | Peroxisome - 1                                  |
| 219 | Ascorbate and aldarate metabolism - 1           | 269 | Apoptosis - 1                                   |
| 220 | Citrate cycle (TCA cycle) - 1                   | 270 | Signaling pathways regulating pluripotency - 1  |
| 221 | Other glycan degradation - 1                    | 271 | Phagosome - 1                                   |
| 222 | Fructose and mannose metabolism - 1             | 272 | Regulation of autophagy - 1                     |
| 223 | Biosynthesis of unsaturated fatty acids - 1     | 273 | Proteasome - 1                                  |
| 224 | ABC transporters - 1                            | 274 | Glycolysis / Gluconeogenesis - 1                |
| 225 | TGF-beta signaling pathway - 1                  | 275 | D-Arginine and D-ornithine metabolism - 1       |
| 226 | Lysosome - 1                                    | 276 | Circadian rhythm - 1                            |
| 227 | Pathogenic Escherichia coli infection - 1       | 277 | Dorso-ventral axis formation - 1                |
| 228 | Tuberculosis - 1                                | 278 | RNA degradation - 1                             |
| 229 | Alzheimers disease - 1                          | 279 | mRNA surveillance pathway - 1                   |
| 230 | Pathways regulating pluripotency - 1            | 280 | Base excision repair - 1                        |
| 231 | Gap junction - 1                                | 281 | RNA transport - 1                               |
| 232 | Notch signaling pathway - 1                     | 282 | Glutathione metabolism - 1                      |
| 233 | Chronic myeloid leukemia - 1                    | 283 | Biosynthesis of amino acids - 1                 |
| 234 | Tight junction - 1                              | 284 | RNA polymerase - 1                              |
| 235 | Neuroactive ligand-receptor interaction - 1     | 285 | Ribosome biogenesis in eukaryotes - 1           |
| 236 | Phospholipase D signaling pathway - 1           | 286 | Homologous recombination - 1                    |
| 237 | Hypertrophic cardiomyopathy (HCM) - 1           | 287 | Wnt signaling pathway - 1                       |
| 238 | Proximal tubule bicarbonate reclamation - 1     | 288 | ErbB signaling pathway - 1                      |
| 239 | Adherens junction - 1                           | 289 | Fanconi anemia pathway - 1                      |
| 240 | Influenza A - 1                                 | 290 | Mismatch repair - 1                             |
| 241 | Measles - 1                                     | 291 | Aminoacyl-tRNA biosynthesis - 1                 |
| 242 | Endometrial cancer - 1                          | 292 | Amoebiasis - 1                                  |
| 243 | Insulin signaling pathway - 1                   | 293 | Hepatitis C - 1                                 |
| 244 | Sulfur metabolism - 1                           | 294 | Alanine, aspartate and glutamate metabolism - 1 |
| 245 | Protein export - 1                              | 295 | Staphylococcus aureus infection - 1             |
| 246 | Steroid biosynthesis - 1                        | 296 | Pentose phosphate pathway - 1                   |
| 247 | Synthesis and degradation of ketone bodies - 1  | 297 | Fatty acid biosynthesis - 1                     |
| 248 | Fatty acid elongation - 1                       | 298 | Oxidative phosphorylation - 1                   |
| 249 | Glycosphingolipid biosynthesis - 1              | 299 | Purine metabolism - 1                           |
| 250 | Valine, leucine and isoleucine biosynthesis - 1 | 300 | Mucin type O-Glycan biosynthesis - 1            |

| Row | Pathway/principle component                      | Row | Pathway/principle component                   |
|-----|--------------------------------------------------|-----|-----------------------------------------------|
| 301 | Arginine biosynthesis - 1                        | 351 | Legionellosis - 2                             |
| 302 | Ubiquinone and other terpenoid-quinone biosynthe | 352 | Asthma - 2                                    |
| 303 | Fatty acid degradation - 1                       | 353 | Pathways regulating pluripotency - 2          |
| 304 | Primary bile acid biosynthesis - 1               | 354 | Focal adhesion - 2                            |
| 305 | Fatty acid metabolism - 1                        | 355 | Longevity regulating pathway - mammal - 2     |
| 306 | 2-Oxocarboxylic acid metabolism - 1              | 356 | Proximal tubule bicarbonate reclamation - 2   |
| 307 | Cytokine-cytokine receptor interaction - 2       | 357 | Insulin signaling pathway - 2                 |
| 308 | Hippo signaling pathway - 2                      | 358 | PI3K-Akt signaling pathway - 2                |
| 309 | Natural killer cell mediated cytotoxicity - 2    | 359 | Allograft rejection - 2                       |
| 310 | Proteoglycans in cancer - 2                      | 360 | Endometrial cancer - 2                        |
| 311 | Complement and coagulation cascades - 2          | 361 | TGF-beta signaling pathway - 2                |
| 312 | Sphingolipid signaling pathway - 2               | 362 | Cell cycle - 1                                |
| 313 | Circadian entrainment - 2                        | 363 | Alcoholism - 1                                |
| 314 | RNA degradation - 2                              | 364 | T cell receptor signaling pathway - 1         |
| 315 | Colorectal cancer - 2                            | 365 | Collecting duct acid secretion - 1            |
| 316 | Herpes simplex infection - 2                     | 366 | Endocytosis - 1                               |
| 317 | Legionellosis - 1                                | 367 | Natural killer cell mediated cytotoxicity - 1 |
| 318 | Chemical carcinogenesis - 1                      | 368 | Pancreatic cancer - 1                         |
| 319 | Platelet activation - 1                          | 369 | Oocyte meiosis - 1                            |
| 320 | Allograft rejection - 1                          | 370 | Vitamin digestion and absorption - 1          |
| 321 | Fc epsilon RI signaling pathway - 2              | 371 | Bile secretion - 1                            |
| 322 | Alcoholism - 2                                   | 372 | Fat digestion and absorption - 1              |
| 323 | Non-small cell lung cancer - 2                   | 373 | Vasopressin-regulated water reabsorption - 1  |
| 324 | Pathogenic Escherichia coli infection - 2        | 374 | Rap1 signaling pathway - 1                    |
| 325 | Cell adhesion molecules (CAMs) - 2               | 375 | Calcium signaling pathway - 1                 |
| 326 | Thyroid cancer - 2                               | 376 | Sulfur relay system - 1                       |
| 327 | Basal cell carcinoma - 2                         | 377 | VEGF signaling pathway - 1                    |
| 328 | Carbon metabolism - 1                            | 378 | Long-term depression - 1                      |
| 329 | Pentose phosphate pathway - 2                    | 379 | Aldosterone synthesis and secretion - 1       |
| 330 | Hedgehog signaling pathway - 2                   | 380 | Renin secretion - 1                           |
| 331 | Circadian rhythm - 2                             | 381 | D-Arginine and D-ornithine metabolism - 2     |
| 332 | Wnt signaling pathway - 2                        | 382 | Pyrimidine metabolism - 2                     |
| 333 | Nucleotide excision repair - 2                   | 383 | Melanoma - 2                                  |
| 334 | Mismatch repair - 2                              | 384 | Cocaine addiction - 1                         |
| 335 | RNA transport - 2                                | 385 | Circadian entrainment - 1                     |
| 336 | Basal transcription factors - 2                  | 386 | ARVC - 1                                      |
| 337 | Insulin resistance - 2                           | 387 | Viral carcinogenesis - 1                      |
| 338 | Arginine biosynthesis - 2                        | 388 | Type I diabetes mellitus - 1                  |
| 339 | Arachidonic acid metabolism - 2                  | 389 | Adrenergic signaling in cardiomyocytes - 1    |
| 340 | Retinol metabolism - 2                           | 390 | Maturity onset diabetes of the young - 1      |
| 341 | Chronic myeloid leukemia - 2                     | 391 | Morphine addiction - 1                        |
| 342 | Hepatitis B - 2                                  | 392 | NF-kappa B signaling pathway - 1              |
| 343 | Pertussis - 2                                    | 393 | Herpes simplex infection - 1                  |
| 344 | Cytosolic DNA-sensing pathway - 2                | 394 | Colorectal cancer - 1                         |
| 345 | Salmonella infection - 2                         | 395 | Phototransduction - 1                         |
| 346 | Acute myeloid leukemia - 2                       | 396 | Transcriptional misregulation in cancer - 1   |
| 347 | Small cell lung cancer - 2                       | 397 | Pathways in cancer - 1                        |
| 348 | Hypertrophic cardiomyopathy (HCM) - 2            | 398 | Thyroid hormone synthesis - 2                 |
| 349 | African trypanosomiasis - 2                      | 399 | Prolactin signaling pathway - 2               |
| 350 | Chemical carcinogenesis - 2                      | 400 | Lysine biosynthesis - 2                       |

| Row | Pathway/principle component                      | Row | Pathway/principle component                      |
|-----|--------------------------------------------------|-----|--------------------------------------------------|
| 401 | Oxidative phosphorylation - 2                    | 451 | HTLV-I infection - 1                             |
| 402 | Inositol phosphate metabolism - 2                | 452 | Adipocytokine signaling pathway - 1              |
| 403 | Glycerolipid metabolism - 2                      | 453 | Type II diabetes mellitus - 1                    |
| 404 | Glycosaminoglycan biosynthesis - 2               | 454 | p53 signaling pathway - 1                        |
| 405 | Mineral absorption - 2                           | 455 | Thyroid hormone signaling pathway - 1            |
| 406 | Taurine and hypotaurine metabolism - 2           | 456 | Oxytocin signaling pathway - 1                   |
| 407 | Notch signaling pathway - 2                      | 457 | Serotonergic synapse - 1                         |
| 408 | Oocyte meiosis - 2                               | 458 | Long-term potentiation - 1                       |
| 409 | Estrogen signaling pathway - 2                   | 459 | Regulation of autophagy - 1                      |
| 410 | Glycosphingolipid biosynthesis - 2               | 460 | Pancreatic secretion - 1                         |
| 411 | Tyrosine metabolism - 2                          | 461 | Vascular smooth muscle contraction - 1           |
| 412 | Drug metabolism - cytochrome P450 - 2            | 462 | Protein processing in endoplasmic reticulum - 1  |
| 413 | Fatty acid degradation - 2                       | 463 | Dopaminergic synapse - 1                         |
| 414 | Primary bile acid biosynthesis - 2               | 464 | Glucagon signaling pathway - 1                   |
| 415 | Butirosin and neomycin biosynthesis - 2          | 465 | Parkinsons disease - 2                           |
| 416 | Cholinergic synapse - 2                          | 466 | DNA replication - 2                              |
| 417 | Glycosylphosphatidylinositol(GPI)-anchor biosynt | 467 | Choline metabolism in cancer - 2                 |
| 418 | Metabolic pathways - 2                           | 468 | Alzheimers disease - 2                           |
| 419 | Biosynthesis of amino acids - 2                  | 469 | Amphetamine addiction - 2                        |
| 420 | Staphylococcus aureus infection - 2              | 470 | Chemokine signaling pathway - 2                  |
| 421 | Malaria - 1                                      | 471 | Purine metabolism - 2                            |
| 422 | Alanine, aspartate and glutamate metabolism - 2  | 472 | ABC transporters - 2                             |
| 423 | PI3K-Akt signaling pathway - 1                   | 473 | Ribosome biogenesis in eukaryotes - 2            |
| 424 | Cytosolic DNA-sensing pathway - 1                | 474 | Systemic lupus erythematosus - 1                 |
| 425 | Renin-angiotensin system - 1                     | 475 | Asthma - 1                                       |
| 426 | Graft-versus-host disease - 1                    | 476 | Peroxisome - 1                                   |
| 427 | Bladder cancer - 1                               | 477 | Autoimmune thyroid disease - 1                   |
| 428 | Inflammatory bowel disease (IBD) - 1             | 478 | Amphetamine addiction - 1                        |
| 429 | Gastric acid secretion - 1                       | 479 | Parkinsons disease - 1                           |
| 430 | Hedgehog signaling pathway - 1                   | 480 | Intestinal immune network for IgA production - 1 |
| 431 | Osteoclast differentiation - 1                   | 481 | Synaptic vesicle cycle - 1                       |
| 432 | Taste transduction - 1                           | 482 | Vibrio cholerae infection - 1                    |
| 433 | AGE-RAGE signaling pathway in diabetes - 1       | 483 | Huntingtons disease - 1                          |
| 434 | Other types of O-glycan biosynthesis - 2         | 484 | Shigellosis - 1                                  |
| 435 | Vitamin B6 metabolism - 2                        | 485 | Osteoclast differentiation - 2                   |
| 436 | Biotin metabolism - 2                            | 486 | Apoptosis - 2                                    |
| 437 | AGE-RAGE signaling pathway in diabetes - 2       | 487 | Carbohydrate digestion and absorption - 2        |
| 438 | Cyanoamino acid metabolism - 2                   | 488 | Vasopressin-regulated water reabsorption - 2     |
| 439 | NF-kappa B signaling pathway - 2                 | 489 | Axon guidance - 2                                |
| 440 | Morphine addiction - 2                           | 490 | Amoebiasis - 2                                   |
| 441 | Peroxisome - 2                                   | 491 | Regulation of lipolysis in adipocytes - 2        |
| 442 | Type I diabetes mellitus - 2                     | 492 | Type II diabetes mellitus - 2                    |
| 443 | Maturity onset diabetes of the young - 2         | 493 | Aldosterone-regulated sodium reabsorption - 2    |
| 444 | Tuberculosis - 2                                 | 494 | Long-term potentiation - 2                       |
| 445 | B cell receptor signaling pathway - 1            | 495 | Long-term depression - 2                         |
| 446 | Taurine and hypotaurine metabolism - 1           | 496 | Aldosterone synthesis and secretion - 2          |
| 447 | Cyanoamino acid metabolism - 1                   | 497 | Synaptic vesicle cycle - 2                       |
| 448 | Selenocompound metabolism - 1                    | 498 | Olfactory transduction - 2                       |
| 449 | Leukocyte transendothelial migration - 1         | 499 | Hematopoietic cell lineage - 2                   |
| 450 | Regulation of lipolysis in adipocytes - 1        | 500 | cAMP signaling pathway - 2                       |

| Row | Pathway/principle component                         | Row | Pathway/principle component                     |
|-----|-----------------------------------------------------|-----|-------------------------------------------------|
| 501 | Huntingtons disease - 2                             | 551 | Platelet activation - 2                         |
| 502 | GABAergic synapse - 2                               | 552 | Chagas disease (American trypanosomiasis) - 2   |
| 503 | Toll-like receptor signaling pathway - 2            | 553 | MicroRNAs in cancer - 2                         |
| 504 | Glycosaminoglycan degradation - 1                   | 554 | Malaria - 2                                     |
| 505 | Drug metabolism - other enzymes - 1                 | 555 | Leishmaniasis - 2                               |
| 506 | Vitamin B6 metabolism - 1                           | 556 | Systemic lupus erythematosus - 2                |
| 507 | Pantothenate and CoA biosynthesis - 1               | 557 | Primary immunodeficiency - 2                    |
| 508 | One carbon pool by folate - 1                       | 558 | Rheumatoid arthritis - 2                        |
| 509 | Arginine and proline metabolism - 1                 | 559 | AMPK signaling pathway - 2                      |
| 510 | Glycosphingolipid biosynthesis - ganglio - 1        | 560 | Longevity regulating pathway - - 2              |
| 511 | Butanoate metabolism - 1                            | 561 | Pentose and glucuronate interconversions - 2    |
| 512 | Pyruvate metabolism - 1                             | 562 | Cardiac muscle contraction - 2                  |
| 513 | Carbohydrate digestion and absorption - 1           | 563 | Glioma - 2                                      |
| 514 | Epithelial cell signaling in Helicobacter - 1       | 564 | Progesterone-mediated oocyte maturation - 2     |
| 515 | Prion diseases - 1                                  | 565 | Prion diseases - 2                              |
| 516 | Bacterial invasion of epithelial cells - 1          | 566 | Influenza A - 2                                 |
| 517 | Nicotine addiction - 1                              | 567 | Base excision repair - 2                        |
| 518 | Neurotrophin signaling pathway - 1                  | 568 | Fatty acid elongation - 2                       |
| 519 | Protein digestion and absorption - 1                | 569 | Citrate cycle (TCA cycle) - 2                   |
| 520 | Fc epsilon RI signaling pathway - 1                 | 570 | Fructose and mannose metabolism - 2             |
| 521 | Glutamatergic synapse - 1                           | 571 | Ascorbate and aldarate metabolism - 2           |
| 522 | Ras signaling pathway - 1                           | 572 | Other glycan degradation - 2                    |
| 523 | Endocrinalcalcium reabsorption - 1                  | 573 | Porphyrin and chlorophyll metabolism - 2        |
| 524 | Proteoglycans in cancer - 1                         | 574 | Lysine degradation - 1                          |
| 525 | Ovarian steroidogenesis - 1                         | 575 | Renal cell carcinoma - 2                        |
| 526 | Hepatitis B - 1                                     | 576 | Terpenoid backbone biosynthesis - 2             |
| 527 | Basal cell carcinoma - 1                            | 577 | Spliceosome - 2                                 |
| 528 | Melanoma - 1                                        | 578 | Pathways in cancer - 1                          |
| 529 | Prostate cancer - 1                                 | 579 | Proteasome - 2                                  |
| 530 | Longevity regulating pathway - - 1                  | 580 | RNA polymerase - 2                              |
| 531 | Histidine metabolism - 1                            | 581 | Adrenergic signaling in cardiomyocytes - 2      |
| 532 | SNARE interactions in vesicular transport - 1       | 582 | Leukocyte transendothelial migration - 1        |
| 533 | Apoptosis - 1                                       | 583 | Regulation of lipolysis in adipocytes - 1       |
| 534 | Progesterone-mediated oocyte maturation - 1         | 584 | HTLV-I infection - 1                            |
| 535 | Non-small cell lung cancer - 1                      | 585 | Adipocytokine signaling pathway - 1             |
| 536 | Thyroid cancer - 1                                  | 586 | Type II diabetes mellitus - 1                   |
| 537 | Rheumatoid arthritis - 1                            | 587 | Thyroid hormone signaling pathway - 1           |
| 538 | Spliceosome - 1                                     | 588 | Oxytocin signaling pathway - 1                  |
| 539 | Steroid hormone biosynthesis - 1                    | 589 | Serotonergic synapse - 1                        |
| 540 | Glioma - 1                                          | 590 | Long-term potentiation - 1                      |
| 541 | Insulin resistance - 1                              | 591 | Regulation of autophagy - 1                     |
| 542 | Axon guidance - 1                                   | 592 | Pancreatic secretion - 1                        |
| 543 | Phenylalanine, tyrosine and tryptophan biosynthesis | 593 | Vascular smooth muscle contraction - 1          |
| 544 | Ether lipid metabolism - 1                          | 594 | Protein processing in endoplasmic reticulum - 1 |
| 545 | Ubiquitin mediated proteolysis - 1                  | 595 | Dopaminergic synapse - 1                        |
| 546 | Glycine, serine and threonine metabolism - 1        | 596 | Glucagon signaling pathway - 1                  |
| 547 | Phagosome - 1                                       | 597 | Non-alcoholic fatty liver disease (NAFLD) - 1   |
| 548 | Melanogenesis - 1                                   | 598 | TNF signaling pathway - 1                       |
| 549 | Mineral absorption - 1                              |     |                                                 |
| 550 | Adherens junction - 2                               |     |                                                 |

## Pathway/module list for glioblastoma (GSE13041) case

| Row | Pathway/module                          | Row | Pathway/module                           |   |                                      |
|-----|-----------------------------------------|-----|------------------------------------------|---|--------------------------------------|
| 1   | +C.Gap junction                         | 51  | +D.Salmonella infection                  |   |                                      |
| 2   | +*Cell cycle - G2/M transition1         | 52  | +D.Shigellosis                           | + | Positive deviation                   |
| 3   | +E.Phospholipase D signaling            | 53  | +D.Bacterial invasion of epithelial      |   |                                      |
| 4   | +P.Choline metabolism in cancer         | 54  | +C.Apoptosis                             | - | Negative deviation                   |
| 5   | +E.Rap1 signaling pathway               | 55  | +M.Metabolic pathways                    |   |                                      |
| 6   | +E.Ras signaling pathway                | 56  | +M.Carbon metabolism                     |   |                                      |
| 7   | +D.Vibrio cholerae infection            | 57  | +M.Starch and sucrose metabolism         | 1 | Principle Component 1                |
| 8   | +*N-glycan biosynthesis, type1          | 58  | +*N-glycosylation                        |   |                                      |
| 9   | +M.Arginine biosynthesis                | 59  | +M.N-Glycan biosynthesis                 | 2 | Principle Component 2                |
| 10  | +M.2-Oxocarboxylic acid                 | 60  | +N.Oxytocin signaling pathway            | M | Metabolic                            |
| 11  | +O.Pancreatic secretion                 | 61  | +O.Long-term potentiation                |   |                                      |
| 12  | +N.Renin secretion                      | 62  | +E.Notch signaling pathway               | G | Genetic information processing       |
| 13  | +O.Olfactory transduction               | 63  | +G.RNA degradation                       |   |                                      |
| 14  | +O.Collecting duct acid secretion       | 64  | +G.Ubiquitin mediated proteolysis        |   |                                      |
| 15  | +*V-type ATPase, eukaryotes1            | 65  | +G.mRNA surveillance pathway             | E | Environmental information processing |
| 16  | +O.Vitamin digestion and absorption     | 66  | +M.Purine metabolism                     |   |                                      |
| 17  | +M.Histidine metabolism                 | 67  | +D.Epstein-Barr virus infection          | C | Cellular processes                   |
| 18  | +M.beta-Alanine metabolism              | 68  | +D.Hepatitis B                           |   |                                      |
| 19  | +M.Ubiquinone biosynthesis              | 69  | +M.Drug metabolism - other enzymes       | I | Immune system                        |
| 20  | +*Ubiquinone biosynthesis, eukaryotes   | 70  | +D.Alcoholism                            | N | Endocrine                            |
| 21  | +E.Calcium signaling pathway            | 71  | +C.Signaling pluripotency of stem cells  |   |                                      |
| 22  | +D.ARVC                                 | 72  | +P.Proteoglycans in cancer               |   |                                      |
| 23  | +D.Dilated cardiomyopathy               | 73  | +E.cGMP-PKG signaling pathway            | O | Other organismal systems             |
| 24  | +D.Hypertrophic cardiomyopathy          | 74  | +E.Neuroactive ligand-receptor           |   |                                      |
| 25  | +O.Inflammatory mediator regulation     | 75  | +C.Peroxisome                            |   |                                      |
| 26  | +P.Acute myeloid leukemia               | 76  | +E.MAPK signaling pathway                | P | Pathways in cancer                   |
| 27  | +E.ErbB signaling pathway               | 77  | +E.Hedgehog signaling pathway            |   |                                      |
| 28  | +M.Inositol phosphate metabolism        | 78  | +O.Synaptic vesicle cycle                | D | Pathways in other diseases           |
| 29  | +E.Phosphatidylinositol signaling       | 79  | +D.Epithelial signaling in Helicobacter  |   |                                      |
| 30  | +M.Glycerophospholipid                  | 80  | +*MAPK (ERK1/2) signaling1               |   |                                      |
| 31  | +O.Vascular smooth muscle cont.         | 81  | +*JAK-STAT signaling1                    |   |                                      |
| 32  | +D.Primary immunodeficiency             | 82  | +D.Amyotrophic lateral sclerosis (ALS)   |   |                                      |
| 33  | +E.Wnt signaling pathway                | 83  | +*O-glycan biosynthesis                  |   |                                      |
| 34  | +N.Melanogenesis                        | 84  | +M.Mucin type O-Glycan biosynthesis      |   |                                      |
| 35  | +N.Aldosterone synthesis and secretion  | 85  | +*MRN complex1                           |   |                                      |
| 36  | +I.Leukocyte transendothelial migration | 86  | +*Citrate cycle, second carbon oxidation |   |                                      |
| 37  | +O.Dorso-ventral axis formation         | 87  | +*Citrate cycle                          |   |                                      |
| 38  | +N.Thyroid hormone signaling pathway    | 88  | +M.Citrate cycle (TCA cycle)             |   |                                      |
| 39  | +E.FoxO signaling pathway               | 89  | +O.Salivary secretion                    |   |                                      |
| 40  | +N.Glucagon signaling pathway           | 90  | +O.Cardiac muscle contraction            |   |                                      |
| 41  | +D.Insulin resistance                   | 91  | +O.GABAergic synapse                     |   |                                      |
| 42  | +N.Insulin signaling pathway            | 92  | -C.Adherens junction                     |   |                                      |
| 43  | +C.Endocytosis                          | 93  | +O.Glutamatergic synapse                 |   |                                      |
| 44  | +G.Protein processing in ER             | 94  | +*Translocon-associated protein          |   |                                      |
| 45  | +*Adenine ribonucleotide biosynthesis   | 95  | +M.Oxidative phosphorylation             |   |                                      |
| 46  | +*eIF4F complex1                        | 96  | +D.Parkinsons disease                    |   |                                      |
| 47  | +D.African trypanosomiasis              | 97  | +*RNA polymerase I, eukaryotes1          |   |                                      |
| 48  | +E.Cell adhesion molecules              | 98  | +*RNA polymerase II, eukaryotes1         |   |                                      |
| 49  | +D.Alzheimers disease                   | 99  | +G.RNA polymerase                        |   |                                      |
| 50  | +*Toll-like receptor signaling1         | 100 | +M.Pyrimidine metabolism                 | * | Module                               |

101 +\*Lsm 1-7 complex1  
102 +\*Lsm 2-8 complex1  
103 +\*Immunoproteasome1  
104 +G.Proteasome  
105 +M.Galactose metabolism  
106 +D.Amphetamine addiction  
107 +\*BER complex1  
108 +\*Uridine monophosphate biosynthesis  
109 +\*Citrate cycle, first carbon oxidation  
110 +O.Gastric acid secretion  
111 +O.Neurotrophin signaling pathway  
112 +N.GnRH signaling pathway  
113 +\*Dermatan sulfate degradation1  
114 +\*Chondroitin sulfate degradation1  
115 +M.Glycosaminoglycan degradation  
116 +\*Heparan sulfate degradation1  
117 +O.Mineral absorption  
118 +G.SNARE interactions in vesicular transport  
119 +M.Arginine and proline metabolism  
120 +O.Serotonergic synapse  
121 +D.Morphine addiction  
122 +O.Retrograde endocannabinoid signaling  
123 +O.Cholinergic synapse  
124 +O.Dopaminergic synapse  
125 +O.Adrenergic signaling in cardiomyocytes  
126 +N.Insulin secretion  
127 +D.Cocaine addiction  
128 +N.Estrogen signaling pathway  
129 +O.Endocrined calcium reabsorption  
130 +M.Fatty acid elongation  
131 +\*Fatty acid biosynthesis  
132 +N.Regulation of lipolysis in adipocytes  
133 +\*C10-C20 isoprenoid biosynthesis  
134 +\*Inositol phosphate metabolism, PI  
135 +\*MAPK (JNK) signaling1  
136 +\*MAPK (p38) signaling1  
137 +I.Fc gamma R-mediated phagocytosis  
138 +I.T cell receptor signaling pathway  
139 +\*Sm core complex1  
140 +C.Oocyte meiosis  
141 +D.AGE-RAGE signaling pathway in diabetes  
142 +E.cAMP signaling pathway  
143 +C.Regulation of actin cytoskeleton  
144 +C.Focal adhesion  
145 +E.PI3K-Akt signaling pathway  
146 +E.ECM-receptor interaction  
147 +D.Amoebiasis  
148 +M.Glutathione metabolism  
149 +P.MicroRNAs in cancer  
150 +\*Glucuronate pathway  
151 +M.Pentose and glucuronate  
152 +M.Alanine, aspartate and glutamate  
153 +\*DNA polymerase delta complex1  
154 +\*MCM complex1  
155 +C.p53 signaling pathway  
156 +P.Small cell lung cancer  
157 +P.Pathways in cancer  
158 +E.HIF-1 signaling pathway  
159 +P.Renal cell carcinoma  
160 +O.Axon guidance  
161 +C.Tight junction  
162 +C.Adherens junction  
163 +\*Spliceosome, U1-snRNP1  
164 +\*Spliceosome, U2-snRNP1  
165 +\*Spliceosome, U4/U6.U5 tri-snRNP1  
166 +G.Spliceosome  
167 +G.Ribosome biogenesis in eukaryotes  
168 +G.RNA transport  
169 +D.HTLV-I infection  
170 +P.Viral carcinogenesis  
171 +G.Homologous recombination  
172 +\*Nuclear pore complex1  
173 +M.One carbon pool by folate  
174 +M.Glycosaminoglycan biosynthesis  
175 +C.Phagosome  
176 +E.VEGF signaling pathway  
177 +\*C1-unit interconversion, eukaryotes1  
178 +\*H/ACA ribonucleoprotein complex1  
179 +M.Tyrosine metabolism  
180 +M.Primary bile acid biosynthesis  
181 +M.Glycosaminoglycan biosynthesis, keratan  
182 +M.Glycosphingolipid biosynthesis, lacto  
183 +O.Taste transduction  
184 +\*cAMP signaling1  
185 +\*Cytochrome c oxidase1  
186 -\*Immunoproteasome2  
187 -\*Lsm 1-7 complex2  
188 -\*Lsm 2-8 complex2  
189 -\*Spliceosome, U4/U6.U5 tri-snRNP2  
190 -\*Spliceosome, U2-snRNP2  
191 -G.Homologous recombination  
192 -P.Small cell lung cancer  
193 -C.p53 signaling pathway  
194 -\*Citrate cycle, first carbon oxidation  
195 -M.Ubiquinone biosynthesis  
196 -\*Ubiquinone biosynthesis, eukaryotes  
197 -\*Nuclear pore complex2  
198 -G.Ribosome biogenesis in eukaryotes  
199 -\*Pyrimidine degradation, uracil  
200 -\*C21-Steroid hormone biosynthesis



| Row | Pathway/module                             | Row | Pathway/module                               |
|-----|--------------------------------------------|-----|----------------------------------------------|
| 201 | -*Chondroitin sulfate degradation2         | 251 | -G.SNARE interactions in vesicular transport |
| 202 | -*Dermatan sulfate degradation2            | 252 | -N.Thyroid hormone signaling pathway         |
| 203 | -M.Glycosaminoglycan degradation           | 253 | -C.Tight junction                            |
| 204 | -*Heparan sulfate degradation2             | 254 | -E.Cell adhesion molecules (CAMs)            |
| 205 | -G.Spliceosome                             | 255 | -C.Focal adhesion                            |
| 206 | -*N-glycan biosynthesis, complex type2     | 256 | -C.Regulation of actin cytoskeleton          |
| 207 | -M.N-Glycan biosynthesis                   | 257 | -D.Insulin resistance                        |
| 208 | -M.Glycosaminoglycan biosynthesis, heparin | 258 | -O.Vascular smooth muscle contraction        |
| 209 | -M.Glycosphingolipid biosynthesis - lacto  | 259 | -D.HTLV-I infection                          |
| 210 | -M.Drug metabolism - other enzymes         | 260 | -N.Glucagon signaling pathway                |
| 211 | -M.Pyrimidine metabolism                   | 261 | -N.Insulin secretion                         |
| 212 | -M.Primary bile acid biosynthesis          | 262 | -E.cAMP signaling pathway                    |
| 213 | -I.Leukocyte transendothelial migration    | 263 | -E.Calcium signaling pathway                 |
| 214 | -D.Amoebiasis                              | 264 | -O.Adrenergic signaling in cardiomyocytes    |
| 215 | -G.RNA polymerase                          | 265 | -O.Pancreatic secretion                      |
| 216 | -*Fatty acid biosynthesis                  | 266 | -O.Salivary secretion                        |
| 217 | -P.Acute myeloid leukemia                  | 267 | -O.Olfactory transduction                    |
| 218 | -E.Notch signaling pathway                 | 268 | -N.Melanogenesis                             |
| 219 | -D.AGE-RAGE signaling pathway in diabetes  | 269 | -O.Inflammatory mediator regulation of TRP   |
| 220 | -*RNA polymerase II, eukaryotes2           | 270 | -O.Neurotrophin signaling pathway            |
| 221 | -*RNA polymerase I, eukaryotes2            | 271 | -E.Rap1 signaling pathway                    |
| 222 | -*N-glycosylation                          | 272 | -P.Pathways in cancer                        |
| 223 | -*Cell cycle - G2/M transition2            | 273 | -E.PI3K-Akt signaling pathway                |
| 224 | -D.Primary immunodeficiency                | 274 | -E.Ras signaling pathway                     |
| 225 | -P.MicroRNAs in cancer                     | 275 | -E.MAPK signaling pathway                    |
| 226 | -O.Dorso-ventral axis formation            | 276 | -M.Metabolic pathways                        |
| 227 | -M.Oxidative phosphorylation               | 277 | -O.Cardiac muscle contraction                |
| 228 | -D.Alzheimers disease                      | 278 | -D.ARVC                                      |
| 229 | -D.Parkinsons disease                      | 279 | -D.Dilated cardiomyopathy                    |
| 230 | -*Citrate cycle, second carbon oxidation   | 280 | -D.Hypertrophic cardiomyopathy (HCM)         |
| 231 | -*Citrate cycle (TCA cycle, Krebs cycle)   | 281 | -D.Alcoholism                                |
| 232 | -M.Citrate cycle (TCA cycle)               | 282 | -G.RNA transport                             |
| 233 | -*MAPK (ERK1/2) signaling2                 | 283 | -D.Epstein-Barr virus infection              |
| 234 | -*Cytochrome c oxidase2                    | 284 | -P.Viral carcinogenesis                      |
| 235 | -C.Peroxisome                              | 285 | -E.FoxO signaling pathway                    |
| 236 | -N.GnRH signaling pathway                  | 286 | -P.Choline metabolism in cancer              |
| 237 | -N.Regulation of lipolysis in adipocytes   | 287 | -G.RNA degradation                           |
| 238 | -M.Fatty acid elongation                   | 288 | -*Glycosphingolipid biosynthesis, lacto      |
| 239 | -*MAPK (p38) signaling2                    | 289 | -M.Mucin type O-Glycan biosynthesis          |
| 240 | -*MAPK (JNK) signaling2                    | 290 | -*O-glycan biosynthesis, mucin               |
| 241 | -M.Inositol phosphate metabolism           | 291 | -*Inositol phosphate metabolism, PI          |
| 242 | -E.Phosphatidylinositol signaling system   | 292 | -M.Carbon metabolism                         |
| 243 | -M.Glycerophospholipid metabolism          | 293 | -E.HIF-1 signaling pathway                   |
| 244 | -C.Signaling pathways, pluripotency        | 294 | -E.cGMP-PKG signaling pathway                |
| 245 | -G.mRNA surveillance pathway               | 295 | -N.Renin secretion                           |
| 246 | -E.Hedgehog signaling pathway              | 296 | -N.Insulin signaling pathway                 |
| 247 | -M.Galactose metabolism                    | 297 | -E.ErbB signaling pathway                    |
| 248 | -M.Starch and sucrose metabolism           | 298 | -N.Aldosterone synthesis and secretion       |
| 249 | -D.Hepatitis B                             | 299 | -O.Gastric acid secretion                    |
| 250 | -*JAK-STAT signaling2                      | 300 | -E.Wnt signaling pathway                     |

| Row | Pathway/module                             | Row | Pathway/module                               |
|-----|--------------------------------------------|-----|----------------------------------------------|
| 301 | -O.Dopaminergic synapse                    | 333 | -P.Proteoglycans in cancer                   |
| 302 | -D.Amphetamine addiction                   | 334 | -E.ECM-receptor interaction                  |
| 303 | -O.Long-term potentiation                  | 335 | -O.Synaptic vesicle cycle                    |
| 304 | -N.Oxytocin signaling pathway              | 336 | -N.Estrogen signaling pathway                |
| 305 | -I.T cell receptor signaling pathway       | 337 | -I.Fc gamma R-mediated phagocytosis          |
| 306 | -O.Axon guidance                           | 338 | -O.Cholinergic synapse                       |
| 307 | -G.Ubiquitin mediated proteolysis          | 339 | -E.Neuroactive ligand-receptor interaction   |
| 308 | -O.Taste transduction                      | 340 | -D.Cocaine addiction                         |
| 309 | -E.Phospholipase D signaling pathway       | 341 | -D.Bacterial invasion of epithelial cells    |
| 310 | -O.Mineral absorption                      | 342 | -M.Alanine, aspartate and glutamate          |
| 311 | -O.Endocrine calcium reabsorption          | 343 | -M.Tyrosine metabolism                       |
| 312 | -C.Oocyte meiosis                          | 344 | -M.Phenylalanine tyrosine biosynthesis       |
| 313 | -D.Amyotrophic lateral sclerosis (ALS)     | 345 | -M.2-Oxocarboxylic acid metabolism           |
| 314 | -C.Endocytosis                             | 346 | -D.Epithelial cell signaling in Helicobacter |
| 315 | -C.Phagosome                               | 347 | -D.Vibrio cholerae infection                 |
| 316 | -G.Protein processing in ER                | 348 | -*V-type ATPase, eukaryotes2                 |
| 317 | -O.Serotonergic synapse                    | 349 | -O.Collecting duct acid secretion            |
| 318 | -C.Gap junction                            | 350 | -M.Arginine and proline metabolism           |
| 319 | -M.Purine metabolism                       | 351 | -*SCF-FBS complex2                           |
| 320 | -E.VEGF signaling pathway                  | 352 | -*SCF-FBW7 complex2                          |
| 321 | -C.Apoptosis                               | 353 | -P.Renal cell carcinoma                      |
| 322 | -M.Histidine metabolism                    | 354 | -G.Proteasome                                |
| 323 | -M.beta-Alanine metabolism                 | 355 | -*BER complex2                               |
| 324 | -D.Salmonella infection                    | 356 | -O.Vitamin digestion and absorption          |
| 325 | -D.Shigellosis                             | 357 | -M.Pentose and glucuronate                   |
| 326 | -*C10-C20 isoprenoid biosynthesis          | 358 | -*Adenine ribonucleotide biosynthesis, IMP   |
| 327 | -M.Glutathione metabolism                  | 359 | -M.D-Glutamine and D-glutamate               |
| 328 | -M.Glycosaminoglycan biosynthesis, keratan | 360 | -O.Retrograde endocannabinoid signaling      |
| 329 | -*cGMP signaling2                          | 361 | -D.Morphine addiction                        |
| 330 | -O.Glutamatergic synapse                   | 362 | -O.GABAergic synapse                         |
| 331 | -M.Arginine biosynthesis                   | 363 | -D.Nicotine addiction                        |
| 332 | -*cAMP signaling2                          |     |                                              |

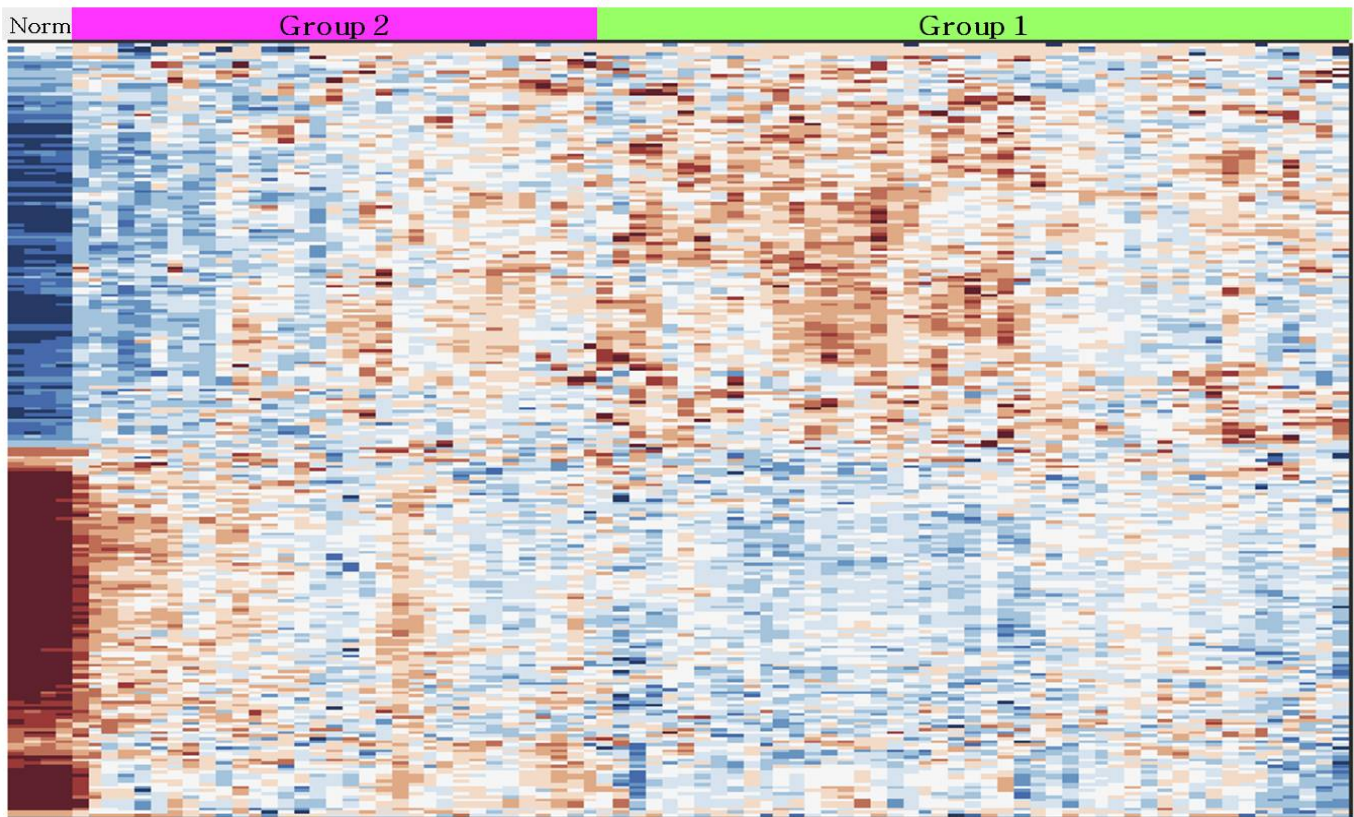

Clustergram for glioblastoma case including normal tissues. For the cancer samples (group 1 and group 2) red indicates increases expression levels of genes in the pathways and blue indicates decreased expression levels.

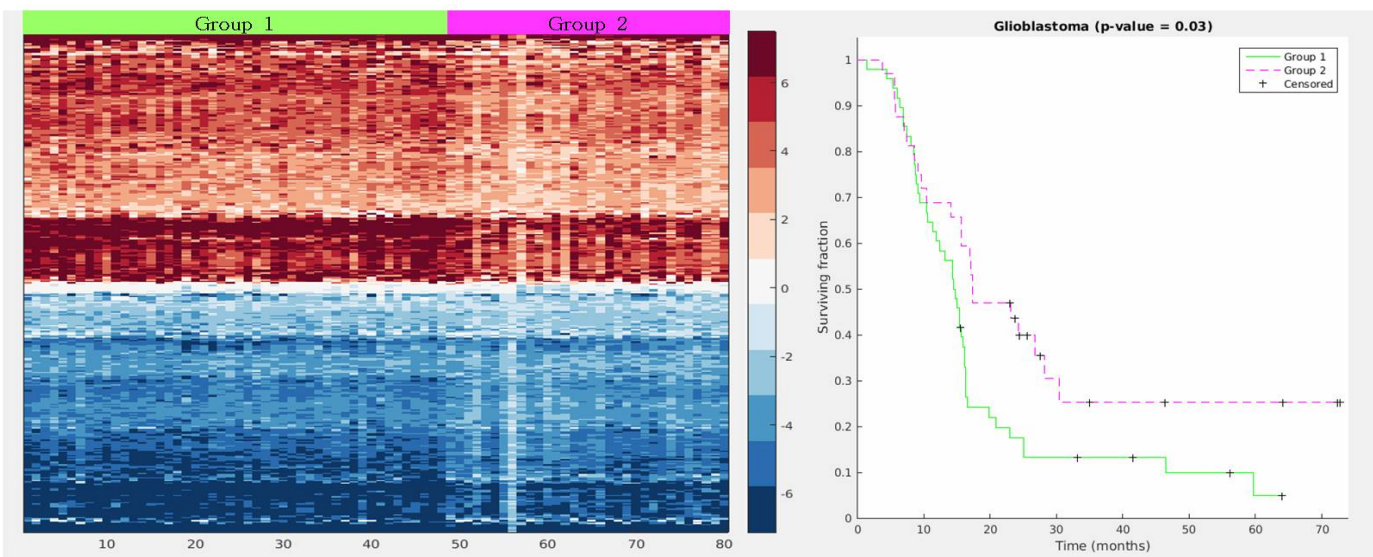

Heatmap and Kaplan-Meier curve (p-value = 0.03) for the glioblastoma case.

## Pathway/module list for adult germ cell (GSE3218) case

| Row | Pathway/module                             | Row | Pathway/module                                  |
|-----|--------------------------------------------|-----|-------------------------------------------------|
| 1   | +*C19/C18-1                                | 51  | +I.Fc gamma R-mediated phagocytosis             |
| 2   | +N.Ovarian steroidogenesis                 | 52  | +I.Antigen processing and presentation          |
| 3   | +E.VEGF signaling pathway                  | 53  | +D.Measles                                      |
| 4   | +M.Arginine biosynthesis                   | 54  | +P.Viral carcinogenesis                         |
| 5   | +E.ErbB signaling pathway                  | 55  | +D.HTLV-I infection                             |
| 6   | +*C21-Steroid hormone biosynthesis         | 56  | +D.Toxoplasmosis                                |
| 7   | +*Pentose phosphate pathway, oxidative     | 57  | +D.Shigellosis                                  |
| 8   | +O.Phototransduction                       | 58  | +D.Epstein-Barr virus infection                 |
| 9   | +O.Taste transduction                      | 59  | +D.Herpes simplex infection                     |
| 10  | +O.Dopaminergic synapse                    | 60  | +D.Influenza A                                  |
| 11  | +E.Notch signaling pathway                 | 61  | +P.Transcriptional misregulation in cancer      |
| 12  | +P.Chronic myeloid leukemia                | 62  | +E.Jak-STAT signaling pathway                   |
| 13  | +P.Renal cell carcinoma                    | 63  | +N.Adipocytokine signaling pathway              |
| 14  | +M.Glycosphingolipid biosynthesis, ganglio | 64  | +*MAPK (p38) signaling1                         |
| 15  | +*PI3K-Akt signaling1                      | 65  | +*Cytochrome c oxidase1                         |
| 16  | +M.Nitrogen metabolism                     | 66  | +*Pentose phosphate pathway                     |
| 17  | +*Survival motor neuron (SMN) complex1     | 67  | +E.ABC transporters                             |
| 18  | +O.Olfactory transduction                  | 68  | +*N-glycan precursor biosynthesis1              |
| 19  | +*Exosome, archaea1                        | 69  | +M.Alanine, aspartate and glutamate             |
| 20  | +*Exosome, eukaryotes1                     | 70  | +G.Ribosome biogenesis in eukaryotes            |
| 21  | +*Succinate dehydrogenase                  | 71  | +M.Pyruvate metabolism                          |
| 22  | +*DNA polymerase gamma complex             | 72  | +G.mRNA surveillance pathway                    |
| 23  | +*TRAMP complex1                           | 73  | +G.RNA transport                                |
| 24  | +N.Renin-angiotensin system                | 74  | +M.Inositol phosphate metabolism                |
| 25  | +O.Protein digestion and absorption        | 75  | +C.Adherens junction                            |
| 26  | +O.Proximal tubule bicarbonate reclamation | 76  | +M.Amino sugar and nucleotide sugar metabolism  |
| 27  | +M.Retinol metabolism                      | 77  | +M.Pentose phosphate pathway                    |
| 28  | +M.Metabolism of xenobiotics by cytochrome | 78  | +*Embden-Meyerhof pathway                       |
| 29  | +M.Drug metabolism - cytochrome P450       | 79  | +M.Glycolysis / Gluconeogenesis                 |
| 30  | +P.Chemical carcinogenesis                 | 80  | +M.Glutathione metabolism                       |
| 31  | +O.Adrenergic signaling in cardiomyocytes  | 81  | +M.Propanoate metabolism                        |
| 32  | +D.Hypertrophic cardiomyopathy             | 82  | +M.Fatty acid elongation                        |
| 33  | +O.Cardiac muscle contraction              | 83  | +D.ARVC                                         |
| 34  | +*Origin recognition complex1              | 84  | +N.Prolactin signaling pathway                  |
| 35  | +C.Phagosome                               | 85  | +M.Other types of O-glycan biosynthesis         |
| 36  | +D.Salmonella infection                    | 86  | +P.Prostate cancer                              |
| 37  | +D.Legionellosis                           | 87  | +P.Endometrial cancer                           |
| 38  | +I.Leukocyte transendothelial migration    | 88  | +N.Glucagon signaling pathway                   |
| 39  | +E.Cell adhesion molecules                 | 89  | +M.Glycerolipid metabolism                      |
| 40  | +I.Platelet activation                     | 90  | +*GPI-anchor biosynthesis, core oligosaccharide |
| 41  | +*JAK-STAT signaling1                      | 91  | +M.Glycosaminoglycan degradation                |
| 42  | +D.AGE-RAGE signaling pathway in diabetes  | 92  | +*Dermatan sulfate degradation1                 |
| 43  | +C.Focal adhesion                          | 93  | +*Chondroitin sulfate degradation1              |
| 44  | +P.MicroRNAs in cancer                     | 94  | +M.Citrate cycle (TCA cycle)                    |
| 45  | +C.p53 signaling pathway                   | 95  | +*C5 isoprenoid biosynthesis, mevalonate        |
| 46  | +C.Cell cycle                              | 96  | +M.Arachidonic acid metabolism                  |
| 47  | +C.Oocyte meiosis                          | 97  | +N.Oxytocin signaling pathway                   |
| 48  | +N.Progesterone-mediated oocyte maturation | 98  | +N.Renin secretion                              |
| 49  | +D.Pathogenic Escherichia coli infection   | 99  | +M.Taurine and hypotaurine metabolism           |
| 50  | +M.Nicotinate and nicotinamide metabolism  | 100 | +M.Ether lipid metabolism                       |

| Row | Pathway/module                               | Row | Pathway/module                            |
|-----|----------------------------------------------|-----|-------------------------------------------|
| 101 | +*BER complex1                               | 151 | +G.Protein processing in ER               |
| 102 | +*MAPK (ERK1/2) signaling1                   | 152 | +E.mTOR signaling pathway                 |
| 103 | +*Spliceosome, 35S U5-snRNP1                 | 153 | +M.Fructose and mannose metabolism        |
| 104 | +G.Spliceosome                               | 154 | +C.Lysosome                               |
| 105 | +G.Ribosome                                  | 155 | +E.HIF-1 signaling pathway                |
| 106 | +*Ribosome, eukaryotes1                      | 156 | +M.N-Glycan biosynthesis                  |
| 107 | +*Phosphatidylcholine biosynthesis, choline  | 157 | +P.Central carbon metabolism in cancer    |
| 108 | +C.Gap junction                              | 158 | +D.Insulin resistance                     |
| 109 | +G.Non-homologous end-joining                | 159 | +N.Insulin signaling pathway              |
| 110 | +G.Fanconi anemia pathway                    | 160 | +E.AMPK signaling pathway                 |
| 111 | +M.Other glycan degradation                  | 161 | +O.Longevity regulating pathway           |
| 112 | +E.Sphingolipid signaling pathway            | 162 | +M.Lysine degradation                     |
| 113 | +P.Choline metabolism in cancer              | 163 | +*eIF4F complex1                          |
| 114 | +G.RNA degradation                           | 164 | +C.Regulation of autophagy                |
| 115 | +M.Glycerophospholipid metabolism            | 165 | +M.Glycosylphosphatidylinositol           |
| 116 | +G.RNA polymerase                            | 166 | +M.Fatty acid metabolism                  |
| 117 | +*RNA polymerase II, eukaryotes1             | 167 | +M.Fatty acid degradation                 |
| 118 | +*Holo-TFIIH complex1                        | 168 | +G.Sulfur relay system                    |
| 119 | +G.Basal transcription factors               | 169 | +D.Vibrio cholerae infection              |
| 120 | +D.Morphine addiction                        | 170 | +*V-type ATPase, eukaryotes1              |
| 121 | +E.cGMP-PKG signaling pathway                | 171 | +*N-glycan biosynthesis, complex type1    |
| 122 | +O.Vasopressin-regulated water reabsorption  | 172 | +N.Aldosterone synthesis and secretion    |
| 123 | +E.Calcium signaling pathway                 | 173 | +M.Glycosphingolipid biosynthesis, globo  |
| 124 | +E.Phospholipase D signaling pathway         | 174 | +*Notch signaling1                        |
| 125 | +O.Axon guidance                             | 175 | +*NADH dehydrogenase                      |
| 126 | +N.Estrogen signaling pathway                | 176 | +*Apoptotic machinery1                    |
| 127 | +G.SNARE interactions in vesicular transport | 177 | +*Ubiquinone biosynthesis                 |
| 128 | +D.Amyotrophic lateral sclerosis (ALS)       | 178 | +M.Fatty acid biosynthesis                |
| 129 | +D.Hepatitis B                               | 179 | +*Decapping complex1                      |
| 130 | +*Inositol phosphate metabolism, PI          | 180 | +M.D-Glutamine and D-glutamate metabolism |
| 131 | +D.Bacterial invasion of epithelial cells    | 181 | +*Creatine pathway1                       |
| 132 | +O.Circadian rhythm                          | 182 | +*Fatty acid biosynthesis, elongation, ER |
| 133 | +E.Ras signaling pathway                     | 183 | +N.PPAR signaling pathway                 |
| 134 | +E.PI3K-Akt signaling pathway                | 184 | +C.Tight junction                         |
| 135 | +P.Pathways in cancer                        | 185 | +*Nuclear pore complex1                   |
| 136 | +E.FoxO signaling pathway                    | 186 | +O.Dorso-ventral axis formation           |
| 137 | +G.Ubiquitin mediated proteolysis            | 187 | +*SCF-BTRC complex1                       |
| 138 | +C.Endocytosis                               | 188 | +M.Lipoic acid metabolism                 |
| 139 | +C.Regulation of actin cytoskeleton          | 189 | +D.Amoebiasis                             |
| 140 | +E.MAPK signaling pathway                    | 190 | +E.ECM-receptor interaction               |
| 141 | +M.Purine metabolism                         | 191 | +P.Small cell lung cancer                 |
| 142 | +M.Pyrimidine metabolism                     | 192 | +*Cell cycle - G2/M transition1           |
| 143 | +M.Carbon metabolism                         | 193 | +*Phosphatidylethanolamine biosynthesis   |
| 144 | +M.Metabolic pathways                        | 194 | +*Cell cycle - G1/S transition1           |
| 145 | +E.Phosphatidylinositol signaling system     | 195 | +*Spliceosome, Prp19/CDC5L complex1       |
| 146 | +D.Parkinsons disease                        | 196 | +*Pyruvate oxidation, pyruvate            |
| 147 | +D.Alzheimers disease                        | 197 | +E.TGF-beta signaling pathway             |
| 148 | +D.Non-alcoholic fatty liver disease         | 198 | +*PRPP biosynthesis, ribose               |
| 149 | +M.Oxidative phosphorylation                 | 199 | +*beta-Oxidation, acyl-CoA synthesis1     |
| 150 | +D.Huntingtons disease                       | 200 | +*Guanine ribonucleotide biosynthesis IMP |

| Row | Pathway/module                           | Row | Pathway/module                                    |
|-----|------------------------------------------|-----|---------------------------------------------------|
| 201 | +*Pyrimidine ribonucleotide biosynthesis | 213 | +*Glycolysis, coremodule                          |
| 202 | +*Pentose phosphate pathway              | 214 | +*Gluconeogenesis, oxaloacetate                   |
| 203 | +*Proteasome, 20S core particle1         | 215 | +D.Epithelial cell signaling, Helicobacter pylori |
| 204 | +*Adenine ribonucleotide biosynthesis    | 216 | +*Cytochrome bc1 complex1                         |
| 205 | +M.Cysteine and methionine metabolism    | 217 | +*ECS complex1                                    |
| 206 | +M.Biosynthesis of amino acids           | 218 | +M.Synthesis and degradation of ketone            |
| 207 | +P.Acute myeloid leukemia                | 219 | +M.Degradation of aromatic compounds              |
| 208 | +*Cul3-SPOP complex1                     | 220 | +*Nucleotide sugar biosynthesis                   |
| 209 | +O.Salivary secretion                    | 221 | +M.Thiamine metabolism                            |
| 210 | +*SCF-FBS complex1                       | 222 | +*SCF-FBW7 complex1                               |
| 211 | +*SCF-SKP2 complex1                      | 223 | +*Inositol phosphate metabolism                   |
| 212 | +*Exon junction complex (EJC)1           | 224 | +M.Vitamin B6 metabolism                          |

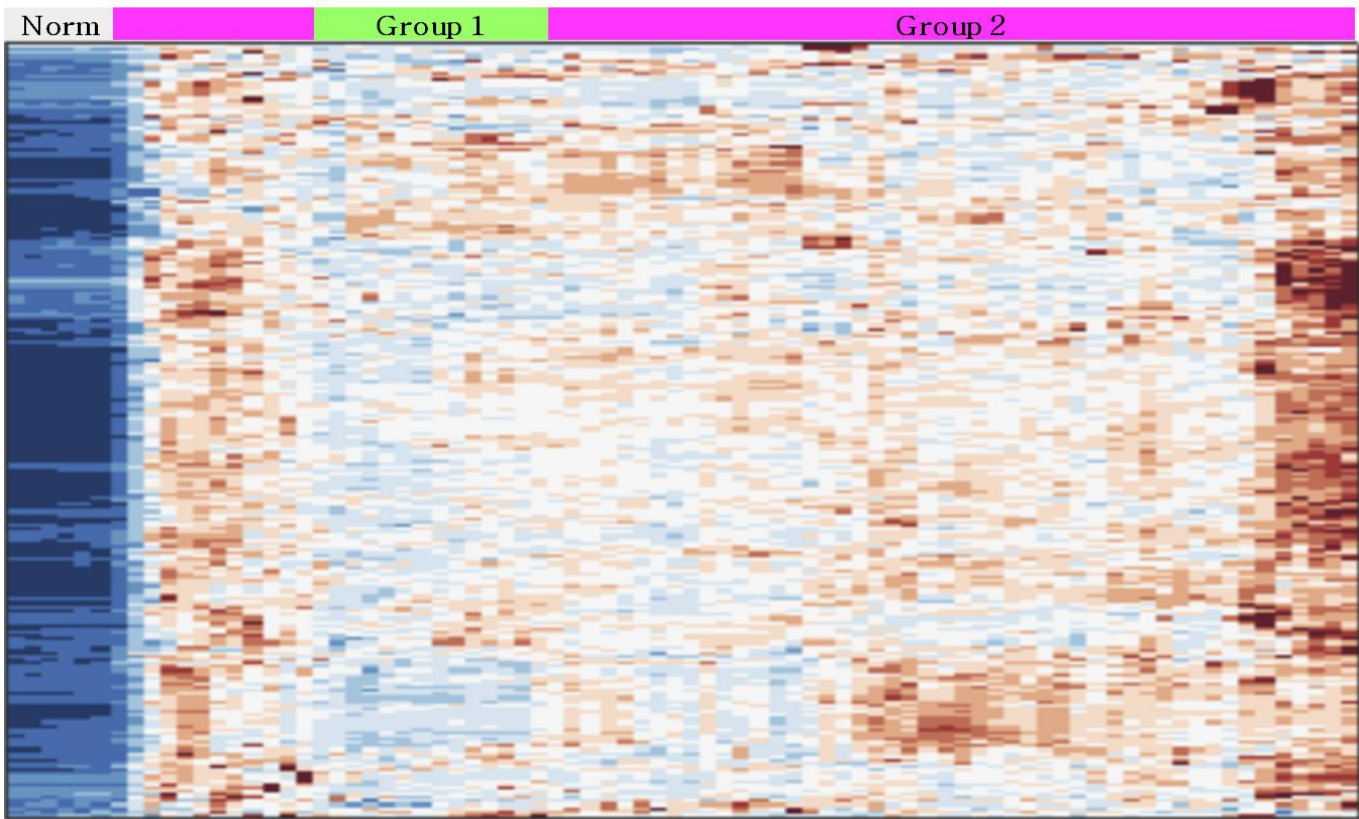

Clustergram for adult germ cell case including normal tissues. For the cancer samples (group 1 and group 2) red indicates increases expression levels of genes in the pathways and blue indicates decreased expression levels.

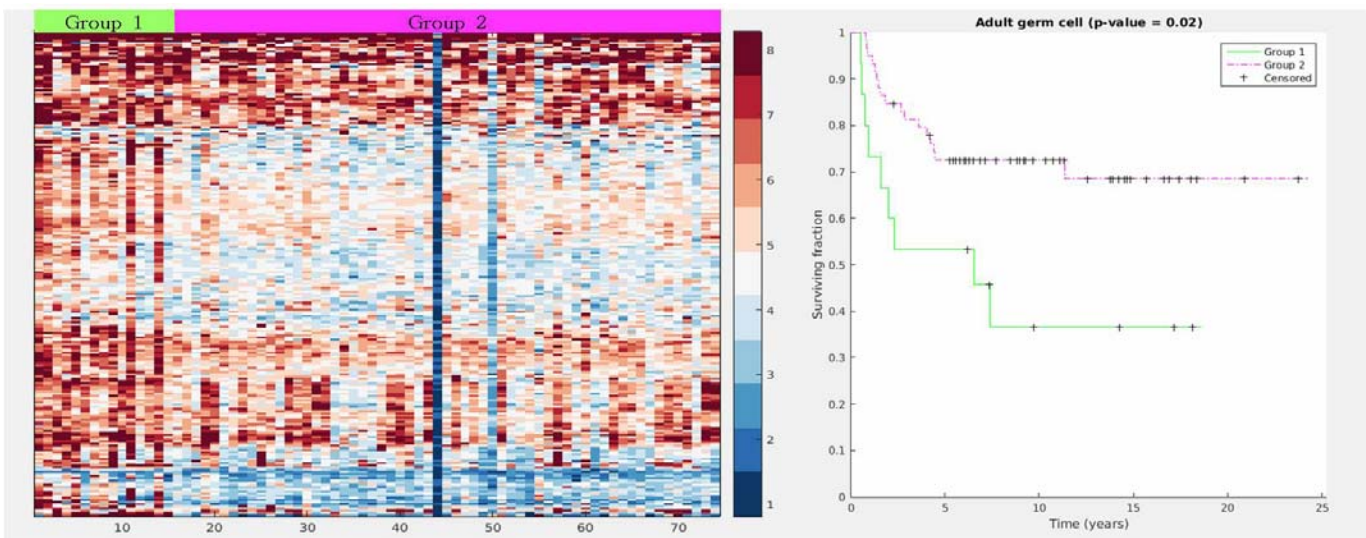

Heatmap and Kaplan-Meier curve (p-value = 0.02) for the adult germ cell case.

## Pathway/module list for ovarian (GSE26712) case

| Row | Pathway/module                            | Row | Pathway/module                       |
|-----|-------------------------------------------|-----|--------------------------------------|
| 1   | -*Pyrimidine degradation, uracil          | 23  | -M.Primary bile acid biosynthesis    |
| 2   | -M.Drug metabolism - other enzymes        | 24  | +M.Primary bile acid biosynthesis    |
| 3   | -M.Glycosaminoglycan biosynthesis         | 25  | +M.Pantothenate and CoA biosynthesis |
| 4   | -M.Pantothenate and CoA biosynthesis      | 26  | +*MAPK (JNK) signaling1              |
| 5   | -*Glycosphingolipid biosynthesis, ganglio | 27  | +*MAPK (p38) signaling1              |
| 6   | -M.beta-Alanine metabolism                | 28  | +M.Glycosaminoglycan biosynthesis    |
| 7   | -P.Choline metabolism in cancer           | 29  | +P.Melanoma                          |
| 8   | -P.Melanoma                               | 30  | +M.Drug metabolism - other enzymes   |
| 9   | -*Wnt signaling2                          | 31  | +E.Rap1 signaling pathway            |
| 10  | -N.Melanogenesis                          | 32  | +E.Ras signaling pathway             |
| 11  | -P.Proteoglycans in cancer                | 33  | +P.Choline metabolism in cancer      |
| 12  | -E.Ras signaling pathway                  | 34  | +E.VEGF signaling pathway            |
| 13  | -E.Rap1 signaling pathway                 | 35  | +P.Proteoglycans in cancer           |
| 14  | -E.VEGF signaling pathway                 | 36  | +N.Melanogenesis                     |
| 15  | -*O-glycan biosynthesis, mucin type       | 37  | +*Wnt signaling1                     |
| 16  | -M.Mucin type O-Glycan biosynthesis       | 38  | +P.Basal cell carcinoma              |
| 17  | -*MAPK (JNK) signaling2                   | 39  | +O.Bile secretion                    |
| 18  | -*MAPK (p38) signaling2                   | 40  | +E.Hedgehog signaling pathway        |
| 19  | -*Inositol phosphate metabolism, PI       | 41  | +*Inositol phosphate metabolism, PI  |
| 20  | -E.Hedgehog signaling pathway             | 42  | +M.beta-Alanine metabolism           |
| 21  | -P.Basal cell carcinoma                   | 43  | +*O-glycan biosynthesis, mucin type  |
| 22  | -O.Bile secretion                         | 44  | +M.Mucin type O-Glycan biosynthesis  |



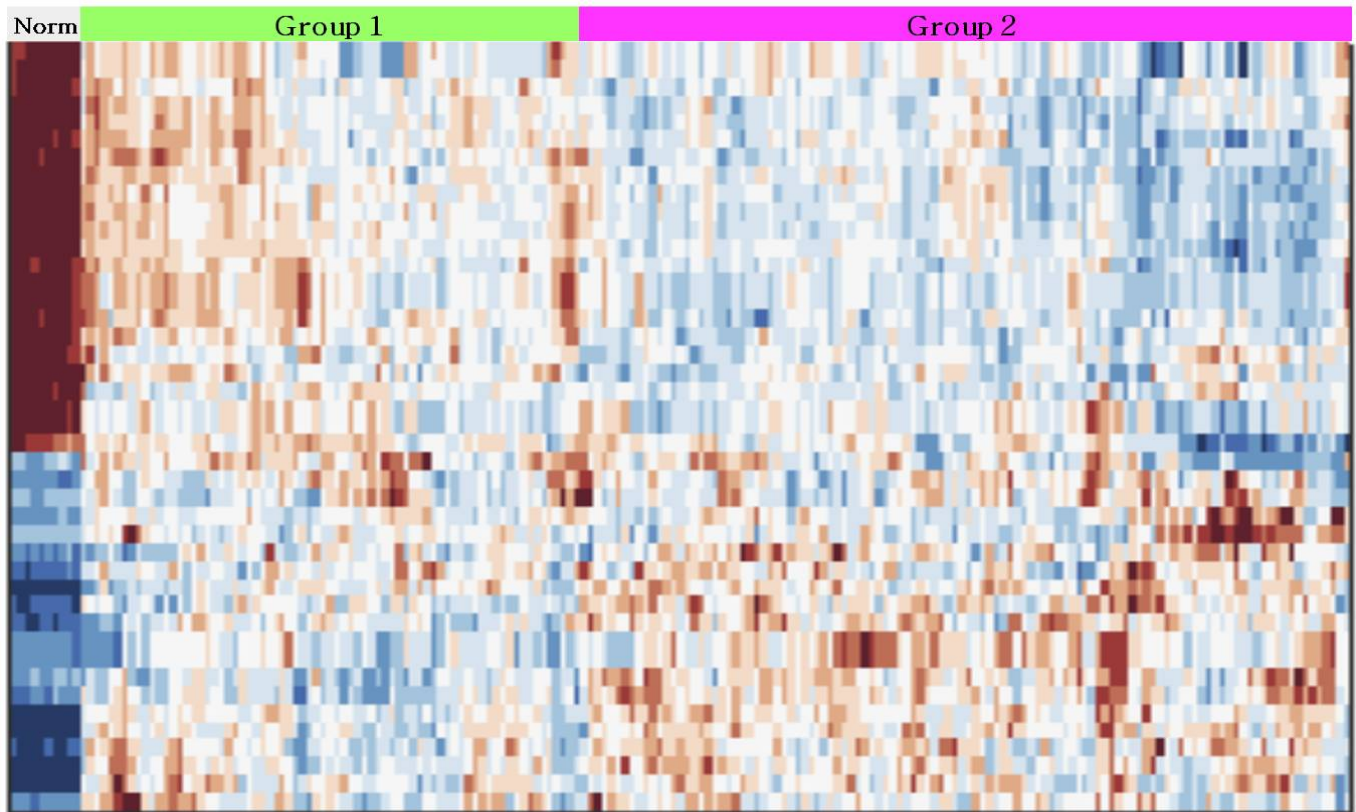

Clustergram for ovarian case including normal tissues. For the cancer samples (group 1 and group 2) red indicates increases expression levels of genes in the pathways and blue indicates decreased expression levels.

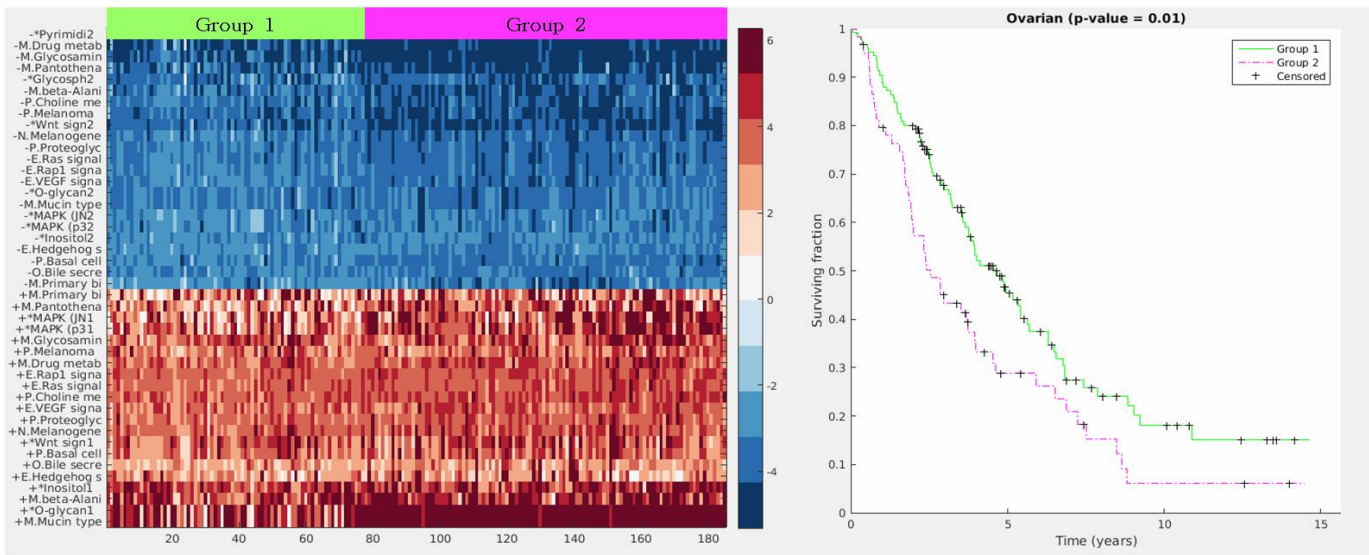

Heatmap and Kaplan-Meier curve (p-value = 0.01) for the ovarian case.

## Supplement for sub-optimally debulked ovarian (GSE26712) case

| Row | Pathway/module                           | Row | Pathway/module           |
|-----|------------------------------------------|-----|--------------------------|
| 1   | *Glycosphingolipid biosynthesis, ganglio | 8   | P.Basal cell carcinoma   |
| 2   | E.VEGF signaling pathway                 | 9   | O.Bile secretion         |
| 3   | *Inositol phosphate metabolism, PI       | 10  | O.Pancreatic secretion   |
| 4   | O.Proximal tubule bicarbonate            | 11  | P.Prostate cancer        |
| 5   | *Pyrimidine degradation, uracil          | 12  | P.Melanoma               |
| 6   | M.Pantothenate and CoA biosynthesis      | 13  | E.Ras signaling pathway  |
| 7   | *Wnt signaling1                          | 14  | E.Rap1 signaling pathway |

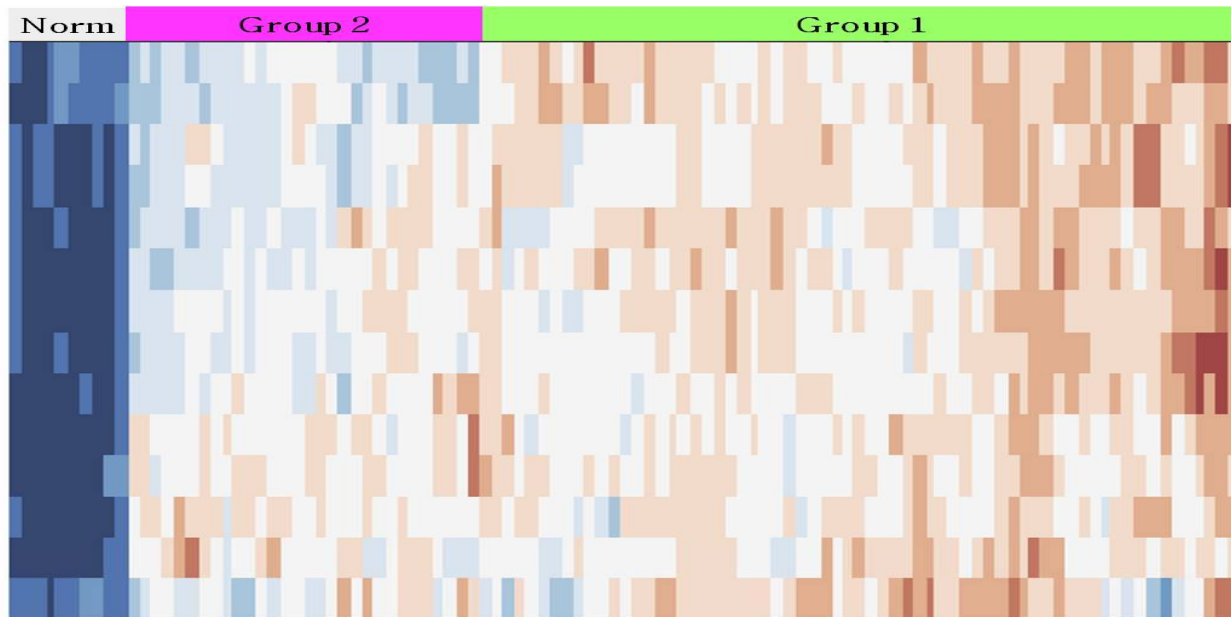

Clustergram for sub-optimally debulked ovarian case including normal tissues. For the cancer samples (group 1 and group 2) red indicates increases expression levels of genes in the pathways and blue indicates decreased expression levels.

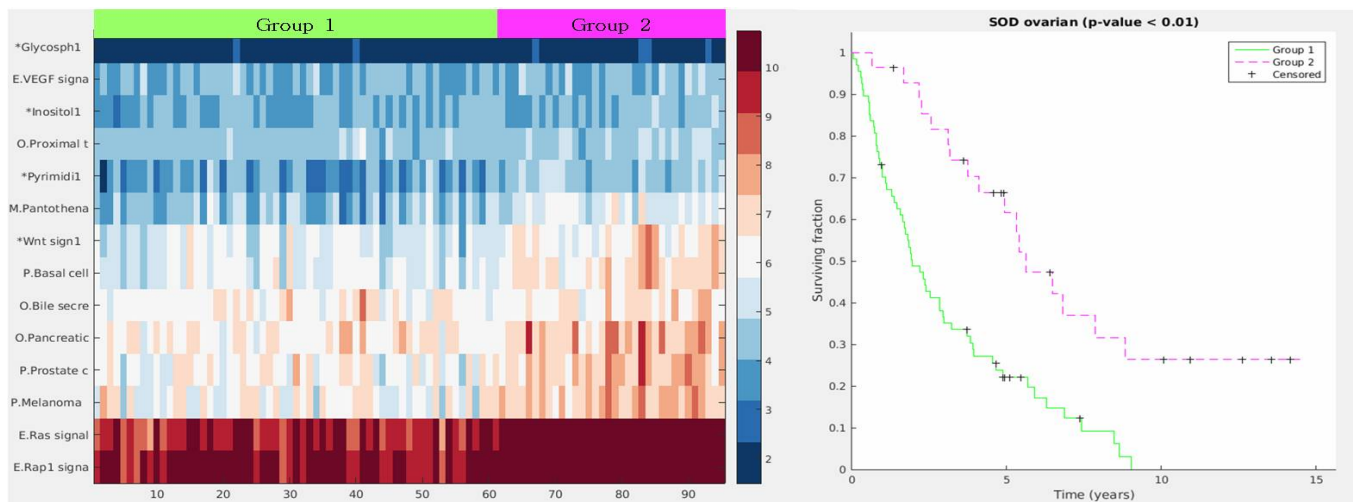

Heatmap and Kaplan-Meier curve (p-value < 0.01) for the sub-optimally debulked ovarian case.

## Pathway/module list for melanoma case

| Row | Pathway/module                               | Row | Pathway/module                              |
|-----|----------------------------------------------|-----|---------------------------------------------|
| 1   | 2E.Cytokine-cytokine receptor interaction    | 51  | 1*Pentose phosphate pathway                 |
| 2   | 1O.Retrograde endocannabinoid signaling      | 52  | 1*Pentose phosphate pathway, non-oxidative  |
| 3   | 1D.Nicotine addiction                        | 53  | 1*beta-Oxidation, acyl-CoA synthesis        |
| 4   | 2E.Cell adhesion molecules (CAMs)            | 54  | 2D.Hepatitis B                              |
| 5   | 2D.Nicotine addiction                        | 55  | 2M.Pentose phosphate pathway                |
| 6   | 2D.Morphine addiction                        | 56  | 2G.Protein processing in ER                 |
| 7   | 1D.Salmonella infection                      | 57  | 2I.Cytosolic DNA-sensing pathway            |
| 8   | 1D.Toxoplasmosis                             | 58  | 1*GABA biosynthesis, eukaryotes, putrescine |
| 9   | 1M.Tryptophan metabolism                     | 59  | 1*Phosphatidylcholine (PC) biosynthesis     |
| 10  | 1D.Autoimmune thyroid disease                | 60  | 1*Pyruvate oxidation, pyruvate =            |
| 11  | 1D.Allograft rejection                       | 61  | 1*Toll-like receptor signaling              |
| 12  | 1D.Leishmaniasis                             | 62  | 2*GABA biosynthesis, eukaryotes, putrescine |
| 13  | 1D.Herpes simplex infection                  | 63  | 1M.Sulfur metabolism                        |
| 14  | 1I.Toll-like receptor signaling pathway      | 64  | 2*Cell cycle - G1/S transition              |
| 15  | 1D.Chagas disease                            | 65  | 2M.Sulfur metabolism                        |
| 16  | 1D.Tuberculosis                              | 66  | 2*Heparan sulfate degradation               |
| 17  | 1D.Measles                                   | 67  | 2*C1-unit interconversion, eukaryotes       |
| 18  | 1I.T cell receptor signaling pathway         | 68  | 1*MAPK (ERK5) signaling                     |
| 19  | 1D.Primary immunodeficiency                  | 69  | 1*Proteasome, 19S regulatory particle       |
| 20  | 1I.Natural killer cell mediated cytotoxicity | 70  | 1*DNA-PK complex                            |
| 21  | 1D.Dilated cardiomyopathy                    | 71  | 2*Pyruvate oxidation, pyruvate              |
| 22  | 1*O-glycan biosynthesis, mucin type core     | 72  | 2*Toll-like receptor signaling              |
| 23  | 1M.Mucin type O-Glycan biosynthesis          | 73  | 2*PI3K-Akt signaling                        |
| 24  | 1D.Maturity onset diabetes of the young      | 74  | 1*C1-unit interconversion, eukaryotes       |
| 25  | 2D.Maturity onset diabetes of the young      | 75  | 2*APC/C complex                             |
| 26  | 2D.Dilated cardiomyopathy                    | 76  | 2*Proteasome, 19S regulatory particle       |
| 27  | 1M.Nitrogen metabolism                       | 77  | 2*ESCRT-0 complex                           |
| 28  | 2E.TNF signaling pathway                     | 78  | 2*Phosphatidylcholine (PC) biosynthesis     |
| 29  | 1I.Cytosolic DNA-sensing pathway             | 79  | 2*MRN complex                               |
| 30  | 2D.Herpes simplex infection                  | 80  | 2*MAPK (ERK5) signaling                     |
| 31  | 1M.Taurine and hypotaurine metabolism        | 81  | 2*DNA-PK complex                            |
| 32  | 1D.Hepatitis B                               | 82  | 2*Inosine monophosphate biosynthesis        |
| 33  | 1G.Protein processing in ER                  | 83  | 2*Exon junction complex (EJC)               |
| 34  | 1D.Prion diseases                            | 84  | 2*N-glycan precursor biosynthesis           |
| 35  | 1M.Phenylalanine metabolism                  | 85  | 1*Inosine monophosphate biosynthesis        |
| 36  | 1M.Phenylalanine tyrosine biosynthesis       | 86  | 1*ESCRT-0 complex                           |
| 37  | 2I.Antigen processing and presentation       | 87  | 1*APC/C complex                             |
| 38  | 1*C19/C18-Steroid hormone biosynthesis       | 88  | 1*MRN complex                               |
| 39  | 1D.Vibrio cholerae infection                 | 89  | 1*Exon junction complex (EJC)               |
| 40  | 2M.Tryptophan metabolism                     | 90  | 1*N-glycan precursor biosynthesis           |
| 41  | 1C.Regulation of autophagy                   | 91  | 2G.Base excision repair                     |
| 42  | 2*C19/C18-Steroid hormone biosynthesis       | 92  | 2*JAK-STAT signaling                        |
| 43  | 1*C21-Steroid hormone biosynthesis           | 93  | 1*Cell cycle - G1/S transition              |
| 44  | 2D.Chagas disease                            | 94  | 1G.Base excision repair                     |
| 45  | 2D.Salmonella infection                      | 95  | 1*PI3K-Akt signaling                        |
| 46  | 2I.Toll-like receptor signaling pathway      | 96  | 1*JAK-STAT signaling                        |
| 47  | 2D.Primary immunodeficiency                  | 97  | 2D.Leishmaniasis                            |
| 48  | 2D.Prion diseases                            | 98  | 2C.Regulation of autophagy                  |
| 49  | 2M.Nitrogen metabolism                       | 99  | 2D.Allograft rejection                      |
| 50  | 2D.Vibrio cholerae infection                 | 100 | 2*Pentose phosphate pathway                 |

| Row | Pathway/module                             | Row | Pathway/module                               |
|-----|--------------------------------------------|-----|----------------------------------------------|
| 101 | 2*Pentose phosphate pathway, non-oxidative | 125 | 2E.Jak-STAT signaling pathway                |
| 102 | 2*C21-Steroid hormone biosynthesis         | 126 | 2D.HTLV-I infection                          |
| 103 | 2*beta-Oxidation, acyl-CoA synthesis       | 127 | 2I.Natural killer cell mediated cytotoxicity |
| 104 | 2*Hedgehog signaling                       | 128 | 1M.Cyanoamino acid metabolism                |
| 105 | 2I.B cell receptor signaling pathway       | 129 | 2M.Taurine and hypotaurine metabolism        |
| 106 | 2C.Apoptosis                               | 130 | 2I.Chemokine signaling pathway               |
| 107 | 2D.Toxoplasmosis                           | 131 | 1E.TNF signaling pathway                     |
| 108 | 2M.Phenylalanine metabolism                | 132 | 2I.Hematopoietic cell lineage                |
| 109 | 1*Hedgehog signaling                       | 133 | 2O.Taste transduction                        |
| 110 | 2D.Epstein-Barr virus infection            | 134 | 2O.Retrograde endocannabinoid signaling      |
| 111 | 2M.Phenylalanine tyrosine biosynthesis     | 135 | 2O.GABAergic synapse                         |
| 112 | 2D.Autoimmune thyroid disease              | 136 | 1E.Calcium signaling pathway                 |
| 113 | 1*Heparan sulfate degradation              | 137 | 1O.Taste transduction                        |
| 114 | 2M.Mucin type O-Glycan biosynthesis        | 138 | 1D.Morphine addiction                        |
| 115 | 2*O-glycan biosynthesis, mucin type core   | 139 | 1O.GABAergic synapse                         |
| 116 | 2D.Tuberculosis                            | 140 | 1I.Antigen processing and presentation       |
| 117 | 2D.Measles                                 | 141 | 1D.HTLV-I infection                          |
| 118 | 2M.Biosynthesis of amino acids             | 142 | 1E.Jak-STAT signaling pathway                |
| 119 | 1M.Pentose phosphate pathway               | 143 | 1E.Cell adhesion molecules (CAMs)            |
| 120 | 1C.Apoptosis                               | 144 | 1I.B cell receptor signaling pathway         |
| 121 | 2M.Cyanoamino acid metabolism              | 145 | 1D.Epstein-Barr virus infection              |
| 122 | 2I.T cell receptor signaling pathway       | 146 | 1I.Hematopoietic cell lineage                |
| 123 | 1M.Biosynthesis of amino acids             | 147 | 1I.Chemokine signaling pathway               |
| 124 | 2E.Calcium signaling pathway               | 148 | 1E.Cytokine-cytokine receptor interaction    |
